# Supplementary material for: miRVaS: a tool to predict the impact of genetic variants on miRNAs
Source: PubMed Central journal article supplement (PMC4756848; doi:10.1093/nar/gkv921), 2015-09-17
Supplement: supp_gkv921_nar-02234-met-n-2015-File004.pdf [file supp_gkv921_nar-02234-met-n-2015-File004.pdf]

## Supplementary Data

Supplementary Figure 1. Density plots for  $\Delta\Delta G$  of MFE predictions of variants with and without an effect on miRNA expression. Intersection points between the curves are shown by the vertical lines.

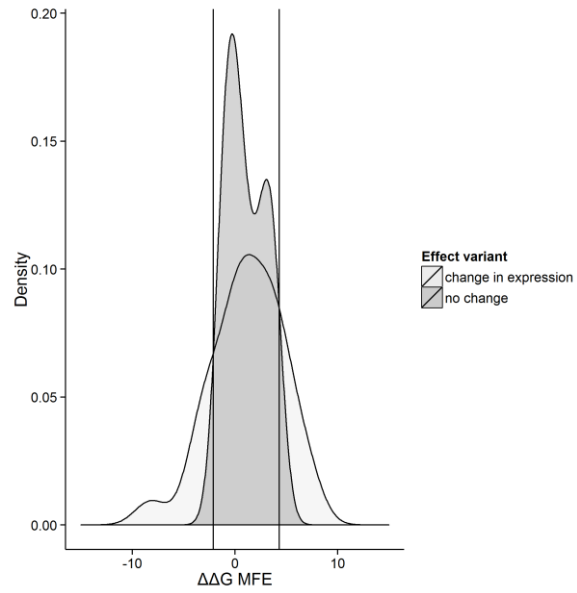

Supplementary Table 1. Results of the analysis of the test set with the  $\Delta\Delta G$  approach for two different  $\Delta\Delta G$  thresholds. PMID: Pubmed ID of the study validating the effect of the variant on expression of the miRNA. Effect: extracted from the referenced study. Location: miRVaS location annotation of the variant relative to the miRNA indicated in the column 'miRNA'.  $\Delta\Delta G(\text{MFE})$ :  $\Delta G$  of variant MFE structure –  $\Delta G$  of wild-type MFE structure. Call A: based on the  $\Delta\Delta G$  approach with the  $|\Delta\Delta G| > 0$  strategy, Call B: based on the  $\Delta\Delta G$  approach with the density interval strategy. Variant chr13:50623101-50623102 G>A was tested twice since its effect was validated on two different miRNAs. For variant chr5:159912417-159912418 C>G, two studies found a difference in expression (a third did not), the effect was categorized as 'changed'.

| Chr   | Begin     | End       | Ref | Alt | PMID                           | Effect         | miRNA         | Location          | $\Delta\Delta G(\text{MFE})$ | Call A | Call B |
|-------|-----------|-----------|-----|-----|--------------------------------|----------------|---------------|-------------------|------------------------------|--------|--------|
| chr1  | 9211781   | 9211782   | C   | T   | 25242229                       | change in expr | hsa-mir-34a   | arm3p(m-e9)       | 0.60                         | TP     | FN     |
| chr1  | 98511730  | 98511731  | C   | T   | 24888363                       | change in expr | hsa-mir-137   | flank5p(a-4)      | 1.20                         | TP     | FN     |
| chr1  | 98511733  | 98511733  |     |     | 24888363                       | change in expr | hsa-mir-137   | flank5p(a-7:6)    | -8.20                        | TP     | TP     |
| chr2  | 241395502 | 241395503 | T   | C   | 23272122                       | change in expr | hsa-mir-149   | arm3p(m+10)       | -2.20                        | TP     | TP     |
| chr3  | 49058127  | 49058128  | C   | A   | 20167074                       | change in expr | hsa-mir-191   | arm5p(m-1e)       | 4.60                         | TP     | TP     |
| chr5  | 148808389 | 148808390 | G   | A   | 16778182                       | no change      | hsa-mir-143   | flank5p(a-91)     | 3.90                         | FP     | TN     |
| chr5  | 148810075 | 148810076 | C   | A   | 16778182                       | no change      | hsa-mir-145   | upstream(a-133)   | 0.00                         | TN     | TN     |
| chr5  | 148810203 | 148810204 | G   | A   | 16778182                       | no change      | hsa-mir-145   | flank5p(a-5)      | 1.10                         | FP     | TN     |
| chr5  | 159912417 | 159912418 | C   | G   | 18474871;18660546;<br>22711332 | change in expr | hsa-mir-146a  | mature3p(a+4)seed | -3.00                        | TP     | TP     |
| chr5  | 168195355 | 168195356 | G   | A   | 23566829                       | change in expr | hsa-mir-218-2 | flank5p(a-96)     | 1.80                         | TP     | FN     |
| chr6  | 52009266  | 52009267  | C   | T   | 18356149                       | no change      | hsa-mir-206   | flank3p(a+35)     | -0.40                        | FP     | TN     |
| chr7  | 129414552 | 129414553 | A   | G   | 22038834                       | change in expr | hsa-mir-96    | mature3p(a+6)seed | 3.90                         | TP     | FN     |
| chr7  | 129414573 | 129414574 | A   | G   | 22038834                       | no change      | hsa-mir-96    | loop(a+e1)        | -1.00                        | FP     | TN     |
| chr7  | 129414595 | 129414596 | G   | T   | 19363479                       | change in expr | hsa-mir-96    | mature5p(a+6)seed | 6.70                         | TP     | TP     |
| chr7  | 129414596 | 129414597 | C   | T   | 19363479;22038834              | change in expr | hsa-mir-96    | mature5p(a+5)seed | 7.20                         | TP     | TP     |
| chr8  | 9760698   | 9760699   | G   | C   | 22430032                       | change in expr | hsa-mir-124-1 | downstream(a+199) | 0.00                         | FN     | FN     |
| chr9  | 73424963  | 73424964  | G   | A   | 26056285                       | no change      | hsa-mir-204   | mature5p(a+5)seed | 2.70                         | FP     | TN     |
| chr9  | 96938219  | 96938220  | C   | A   | 16778182                       | no change      | hsa-let-7a-1  | flank5p(a-19)     | 3.70                         | FP     | TN     |
| chr9  | 139565149 | 139565150 | A   | G   | 20621067                       | change in expr | hsa-mir-126   | flank3p(a+12)     | -3.10                        | TP     | TP     |
| chr10 | 53059405  | 53059406  | T   | C   | 25683625                       | change in expr | hsa-mir-605   | arm3p(m+2)        | -2.60                        | TP     | TP     |
| chr10 | 102734777 | 102734778 | C   | G   | 24743625                       | change in expr | hsa-mir-608   | mature5p(a+22)    | 3.00                         | TP     | FN     |
| chr10 | 135061111 | 135061112 | C   | T   | 23334589                       | change in expr | hsa-mir-202   | arm5p(m-15)       | 0.70                         | TP     | FN     |
| chr12 | 62997345  | 62997346  | G   | C   | 16778182                       | no change      | hsa-let-7i    | upstream(a-120)   | 0.00                         | TN     | TN     |
| chr12 | 81329535  | 81329536  | A   | C   | 24503492                       | change in expr | hsa-mir-618   | arm3p(l+25)       | -3.80                        | TP     | TP     |
| chr13 | 50623101  | 50623102  | G   | A   | 16251535                       | change in expr | hsa-mir-16-1  | flank3p(a+7)      | 0.00                         | FN     | FN     |
| chr13 | 50623101  | 50623102  | G   | A   | 16251535                       | change in expr | hsa-mir-15a   | downstream(a+153) | 0.00                         | FN     | FN     |
| chr16 | 69967004  | 69967005  | C   | A   | 20358594;22012839              | change in expr | hsa-mir-140   | arm5p(m-1e)       | 2.50                         | TP     | FN     |
| chr17 | 57918726  | 57918727  | A   | G   | 16778182                       | no change      | hsa-mir-21    | flank3p(a+29)     | -1.30                        | FP     | TN     |
| chr19 | 52196135  | 52196136  | G   | A   | 18356149                       | change in expr | hsa-let-7e    | flank3p(a+19)     | -0.70                        | TP     | FN     |
| chr19 | 52196408  | 52196409  | G   | A   | 21788734                       | change in expr | hsa-mir-125a  | flank5p(a-98)     | 1.40                         | TP     | FN     |
| chr19 | 52196452  | 52196453  | T   | C   | 21788734                       | no change      | hsa-mir-125a  | flank5p(a-54)     | -1.00                        | FP     | TN     |
| chr19 | 52196527  | 52196528  | G   | T   | 17400653                       | change in expr | hsa-mir-125a  | mature5p(a+8)     | 5.70                         | TP     | TP     |
| chr21 | 17912066  | 17912067  | C   | G   | 16778182                       | no change      | hsa-let-7c    | flank5p(a-81)     | 2.70                         | FP     | TN     |
| chr22 | 46509539  | 46509540  | C   |     | 16778182                       | no change      | hsa-let-7b    | flank5p(a-26)     | 1.30                         | FP     | TN     |
| chr22 | 46509676  | 46509677  | G   | C   | 16778182                       | no change      | hsa-let-7b    | flank3p(a+29)     | 3.40                         | FP     | TN     |
| chr22 | 46509701  | 46509702  | G   | A   | 16778182                       | no change      | hsa-let-7b    | flank3p(a+54)     | 0.00                         | TN     | TN     |
| chrX  | 49779217  | 49779218  | C   | G   | 19568434;19617315              | change in expr | hsa-mir-502   | arm5p(m-3)        | 3.80                         | TP     | FN     |
| chrX  | 135633050 | 135633051 | T   | G   | 19617315                       | change in expr | hsa-mir-934   | mature5p(a+e1)    | 2.10                         | TP     | FN     |

|      |           |           |   |   |                   |                |              |                   |       |    |    |
|------|-----------|-----------|---|---|-------------------|----------------|--------------|-------------------|-------|----|----|
| chrX | 145075803 | 145075804 | C | G | 19617315          | change in expr | hsa-mir-890  | arm3p(l+23)       | 3.50  | TP | FN |
| chrX | 145078732 | 145078733 | A | G | 19617315          | change in expr | hsa-mir-892b | mature3p(a+15)    | 4.70  | TP | TP |
| chrX | 146353878 | 146353879 | A | G | 19568434;19617315 | change in expr | hsa-mir-510  | mature3p(a+2)seed | 3.90  | TP | FN |
| chrX | 146353920 | 146353921 | C | T | 19617315          | change in expr | hsa-mir-510  | arm5p(m-4)        | -0.60 | TP | FN |

Supplementary Table 2. Results of the analysis of the test set with the hairpin approach. HI columns: highest structural impact as calculated by miRVA-S. Call: based on the hairpin approach.

| Chr   | Begin     | End       | Ref | Alt             | PMID                       | Effect         | miRNA         | Location          | HI CEN    | HI MEA    | HI MFE    | Call CEN | Call MEA | Call MFE |
|-------|-----------|-----------|-----|-----------------|----------------------------|----------------|---------------|-------------------|-----------|-----------|-----------|----------|----------|----------|
| chr1  | 9211781   | 9211782   | C   | T               | 25242229                   | change in expr | hsa-mir-34a   | arm3p(m-e9)       | arm       | arm       | arm       | TP       | TP       | TP       |
| chr1  | 98511730  | 98511731  | C   | T               | 24888363                   | change in expr | hsa-mir-137   | flank5p(a-4)      | flank     | flank     | arm       | FN       | FN       | TP       |
| chr1  | 98511733  | 98511733  |     | CCGCTGCCGCTGCTA | 24888363                   | change in expr | hsa-mir-137   | flank5p(a-7:6)    | flank     | flank     | arm       | FN       | FN       | TP       |
| chr2  | 241395502 | 241395503 | T   | C               | 23272122                   | change in expr | hsa-mir-149   | arm3p(m+10)       | nochange  | nochange  | nochange  | FN       | FN       | FN       |
| chr3  | 49058127  | 49058128  | C   | A               | 20167074                   | change in expr | hsa-mir-191   | arm5p(m-1e)       | mature    | mature    | mature    | TP       | TP       | TP       |
| chr5  | 148808389 | 148808390 | G   | A               | 16778182                   | no change      | hsa-mir-143   | flank5p(a-91)     | flank     | flank     | flank     | TN       | TN       | TN       |
| chr5  | 148810075 | 148810076 | C   | A               | 16778182                   | no change      | hsa-mir-145   | upstream(a-133)   | no change | no change | no change | TN       | TN       | TN       |
| chr5  | 148810203 | 148810204 | G   | A               | 16778182                   | no change      | hsa-mir-145   | flank5p(a-5)      | flank     | flank     | flank     | TN       | TN       | TN       |
| chr5  | 159912417 | 159912418 | C   | G               | 18474871;18660546;22711332 | change in expr | hsa-mir-146a  | mature3p(a+4)seed | seed      | seed      | seed      | TP       | TP       | TP       |
| chr5  | 168195355 | 168195356 | G   | A               | 23566829                   | change in expr | hsa-mir-218-2 | flank5p(a-96)     | arm       | arm       | arm       | TP       | TP       | TP       |
| chr6  | 52009266  | 52009267  | C   | T               | 18356149                   | no change      | hsa-mir-206   | flank3p(a+35)     | flank     | flank     | flank     | TN       | TN       | TN       |
| chr7  | 129414552 | 129414553 | A   | G               | 22038834                   | change in expr | hsa-mir-96    | mature3p(a+6)seed | seed      | seed      | seed      | TP       | TP       | TP       |
| chr7  | 129414573 | 129414574 | A   | G               | 22038834                   | no change      | hsa-mir-96    | loop(a+e1)        | arm       | arm       | arm       | FP       | FP       | FP       |
| chr7  | 129414595 | 129414596 | G   | T               | 19363479                   | change in expr | hsa-mir-96    | mature5p(a+6)seed | seed      | seed      | seed      | TP       | TP       | TP       |
| chr7  | 129414596 | 129414597 | C   | T               | 19363479;22038834          | change in expr | hsa-mir-96    | mature5p(a+5)seed | seed      | seed      | seed      | TP       | TP       | TP       |
| chr8  | 9760698   | 9760699   | G   | C               | 22430032                   | change in expr | hsa-mir-124-1 | downstream(a+199) | no change | no change | no change | FN       | FN       | FN       |
| chr9  | 73424963  | 73424964  | G   | A               | 26056285                   | no change      | hsa-mir-204   | mature5p(a+5)seed | nochange  | nochange  | nochange  | TN       | TN       | TN       |
| chr9  | 96938219  | 96938220  | C   | A               | 16778182                   | no change      | hsa-let-7a-1  | flank5p(a-19)     | flank     | flank     | flank     | TN       | TN       | TN       |
| chr9  | 139565149 | 139565150 | A   | G               | 20621067                   | change in expr | hsa-mir-126   | flank3p(a+12)     | arm       | arm       | flank     | TP       | TP       | FN       |
| chr10 | 53059405  | 53059406  | T   | C               | 25683625                   | change in expr | hsa-mir-605   | arm3p(m+2)        | nochange  | nochange  | nochange  | FN       | FN       | FN       |
| chr10 | 102734777 | 102734778 | C   | G               | 24743625                   | change in expr | hsa-mir-608   | mature5p(a+22)    | mature    | mature    | mature    | TP       | TP       | TP       |
| chr10 | 135061111 | 135061112 | C   | T               | 23334589                   | change in expr | hsa-mir-202   | arm5p(m-15)       | arm       | arm       | arm       | TP       | TP       | TP       |
| chr12 | 62997345  | 62997346  | G   | C               | 16778182                   | no change      | hsa-let-7i    | upstream(a-120)   | no change | no change | no change | TN       | TN       | TN       |
| chr12 | 81329535  | 81329536  | A   | C               | 24503492                   | change in expr | hsa-mir-618   | arm3p(l+25)       | seed      | seed      | seed      | TP       | TP       | TP       |
| chr13 | 50623101  | 50623102  | G   | A               | 16251535                   | change in expr | hsa-mir-16-1  | flank3p(a+7)      | nochange  | flank     | nochange  | FN       | FN       | FN       |
| chr13 | 50623101  | 50623102  | G   | A               | 16251535                   | change in expr | hsa-mir-15a   | downstream(a+153) | no change | no change | no change | FN       | FN       | FN       |
| chr16 | 69967004  | 69967005  | C   | A               | 20358594;22012839          | change in expr | hsa-mir-140   | arm5p(m-1e)       | mature    | mature    | mature    | TP       | TP       | TP       |
| chr17 | 57918726  | 57918727  | A   | G               | 16778182                   | no change      | hsa-mir-21    | flank3p(a+29)     | flank     | flank     | flank     | TN       | TN       | TN       |
| chr19 | 52196135  | 52196136  | G   | A               | 18356149                   | change in expr | hsa-let-7e    | flank3p(a+19)     | flank     | flank     | flank     | FN       | FN       | FN       |
| chr19 | 52196408  | 52196409  | G   | A               | 21788734                   | change in expr | hsa-mir-125a  | flank5p(a-98)     | flank     | flank     | flank     | FN       | FN       | FN       |
| chr19 | 52196452  | 52196453  | T   | C               | 21788734                   | no change      | hsa-mir-125a  | flank5p(a-54)     | flank     | flank     | flank     | TN       | TN       | TN       |
| chr19 | 52196527  | 52196528  | G   | T               | 17400653                   | change in expr | hsa-mir-125a  | mature5p(a+8)     | seed      | seed      | seed      | TP       | TP       | TP       |
| chr21 | 17912066  | 17912067  | C   | G               | 16778182                   | no change      | hsa-let-7c    | flank5p(a-81)     | flank     | flank     | flank     | TN       | TN       | TN       |
| chr22 | 46509539  | 46509540  | C   | G               | 16778182                   | no change      | hsa-let-7b    | flank5p(a-26)     | flank     | flank     | flank     | TN       | TN       | TN       |
| chr22 | 46509676  | 46509677  | G   | C               | 16778182                   | no change      | hsa-let-7b    | flank3p(a+29)     | mature    | mature    | mature    | FP       | FP       | FP       |
| chr22 | 46509701  | 46509702  | G   | A               | 16778182                   | no change      | hsa-let-7b    | flank3p(a+54)     | nochange  | nochange  | nochange  | TN       | TN       | TN       |
| chrX  | 49779217  | 49779218  | C   | G               | 19568434;19617315          | change in expr | hsa-mir-502   | arm5p(m-3)        | arm       | arm       | arm       | TP       | TP       | TP       |
| chrX  | 135633050 | 135633051 | T   | G               | 19617315                   | change in expr | hsa-mir-934   | mature5p(a+e1)    | mature    | mature    | mature    | TP       | TP       | TP       |
| chrX  | 145075803 | 145075804 | C   | G               | 19617315                   | change in expr | hsa-mir-890   | arm3p(l+23)       | arm       | arm       | arm       | TP       | TP       | TP       |
| chrX  | 145078732 | 145078733 | A   | G               | 19617315                   | change in expr | hsa-mir-892b  | mature3p(a+15)    | mature    | mature    | mature    | TP       | TP       | TP       |
| chrX  | 146353878 | 146353879 | A   | G               | 19568434;19617315          | change in expr | hsa-mir-510   | mature3p(a+2)seed | seed      | seed      | seed      | TP       | TP       | TP       |
| chrX  | 146353920 | 146353921 | C   | T               | 19617315                   | change in expr | hsa-mir-510   | arm5p(m-4)        | arm       | arm       | mature    | TP       | TP       | TP       |
